# Supplementary material for: Autologous Micro-Fragmented Adipose Tissue (MFAT) to Treat Symptomatic Knee Osteoarthritis: Early Outcomes of a Consecutive Case Series
Source: MDPI journal article supplement (doi:10.3390/jcm10112231), 2021-05-21
Supplement: s1 [file s1]

## Supplementary material

**Table S1.** Detailed overview of study adverse events (AEs). The parameters ‘pain’, ‘effusion’ and ‘stiffness’ as part of the inflammatory reaction triad were scored as separate adverse events. (MFAT, micro-fragmented adipose tissue; ITB, iliotibial band; OA, osteoarthritis)

| Category            | AEs                                      | Quantity (%)                     | Severity                                           | Duration (days)    |
|---------------------|------------------------------------------|----------------------------------|----------------------------------------------------|--------------------|
| Liposuction-related | Abdominal pain, swelling or numbness     | 4 subjects (6.3%)                | Moderate: 75%<br>Severe: 25%                       | 33.5 ± 54.6        |
| MFAT-related        | Inflammatory triad (at least 1 out of 3) | 72 knees (79%)                   | Mild: 16%<br>Moderate: 52%<br>Severe: 32%          | 16.6 ± 13.5        |
|                     | Pain                                     | 30 events                        | Mild: 10%<br>Moderate: 60%<br>Severe: 30%          | 17.3 ± 12.9        |
|                     | Swelling                                 | 33 events                        | Mild: 21%<br>Moderate: 49%<br>Severe: 30%          | 16.8 ± 11.6        |
|                     | Stiffness                                | 35 events                        | Mild: 17%<br>Moderate: 46%<br>Severe: 37%          | 15.7 ± 15.8        |
| Others              | Total                                    | 7 subjects (10.9%)               | Mild: 23%<br>Moderate: 69%<br>Severe: 8%           | 65.5 ± 103.5       |
|                     | Subjective Knee instability              | 3 events                         | Mild: 67%<br>Moderate: 33%                         | 14.0 ± 0.0         |
|                     | Tendinopathy (ITB, patella)              | 3 events                         | Moderate: 100%                                     | 162,7 ± 172.6      |
|                     | Aching calve muscles                     | 2 events                         | Moderate: 100%                                     | 14.0 ± 0.0         |
|                     | OA worsening                             | 1 event                          | Severe: 100%                                       | 206.0 ± 0.0        |
|                     | Stroke                                   | 2 events                         | Moderate: 100%                                     | 25.0 ± 0.0         |
|                     | Gallstones                               | 1 event                          | Mild: 100%                                         | 21.0 ± 0.0         |
| <b>Total AEs</b>    | /                                        | <b>119 events in 53 subjects</b> | <b>Mild: 16%<br/>Moderate: 45%<br/>Severe: 39%</b> | <b>25.0 ± 42.0</b> |

**Table S2.** NRS pain, UCLA and EQ-5D index outcomes after MFAT administration. The UCLA and EQ-5D were assessed separately for the unilateral and bilateral injected subjects.

| <b>Tx</b> | <b>NRS pain index<br/>knee (n=64)</b> | <b>P-value<br/>(baseline – Tx)</b> |                                   |                                    |
|-----------|---------------------------------------|------------------------------------|-----------------------------------|------------------------------------|
| Baseline  | 5.5 ± 2.2                             | /                                  |                                   |                                    |
| 1 month   | 4.8 ± 2.2                             | 0.0073*                            |                                   |                                    |
| 3 month   | 3.8 ± 2.4                             | <0.0001*                           |                                   |                                    |
| 6 month   | 4.0 ± 2.7                             | <0.0001*                           |                                   |                                    |
| 12 month  | 4.2 ± 2.5                             | 0.0002*                            |                                   |                                    |
| <b>Tx</b> | <b>UCLA Unilateral<br/>(n=37)</b>     | <b>P-value<br/>(baseline – Tx)</b> | <b>UCLA Bilateral<br/>(n=27)</b>  | <b>P-value<br/>(baseline – Tx)</b> |
| Baseline  | 6.2 ± 2.2                             | /                                  | 5.8 ± 2.0                         | /                                  |
| 1 month   | /                                     | /                                  | /                                 | /                                  |
| 3 month   | 6.00 ± 2.1                            | n.s.                               | 6.1 ± 2.2                         | n.s.                               |
| 6 month   | 6.1 ± 2.1                             | n.s.                               | 6.4 ± 2.2                         | n.s.                               |
| 12 month  | 6.2 ± 2.1                             | n.s.                               | 6.5 ± 2.0                         | n.s.                               |
| <b>Tx</b> | <b>EQ-5D Unilateral<br/>(n=37)</b>    | <b>P-value<br/>(baseline – Tx)</b> | <b>EQ-5D<br/>Bilateral (n=27)</b> | <b>P-value<br/>(baseline – Tx)</b> |
| Baseline  | 0.8099 ± 0.0463                       | /                                  | 0.8064 ± 0.0609                   | /                                  |
| 1 month   | /                                     | /                                  | /                                 | /                                  |
| 3 month   | 0.8429 ± 0.0698                       | 0.0154*                            | 0.848 ± 0.0924                    | 0.0359*                            |
| 6 month   | 0.8673 ± 0.0963                       | 0.0007*                            | 0.8509 ± 0.0926                   | 0.0289*                            |
| 12 month  | 0.8507 ± 0.084                        | 0.0023*                            | 0.8359 ± 0.082                    | n.s.                               |
